# Supplementary material for: Systematic review of systematic reviews of non-pharmacological interventions to treat behavioural disturbances in older patients with dementia. The SENATOR-OnTop series
Source: PubMed Central journal article supplement — BMJ Open. 2017 Mar 16;7(3):e012759. doi: 10.1136/bmjopen-2016-012759 (PMC5372076; doi:10.1136/bmjopen-2016-012759), 2017-03-16
Supplement: bmjopen-2016-012759supp_appendix1.pdf [file bmjopen-2016-012759supp_appendix1.pdf]

# Appendix 1. Search strategies

## 1. Medline (via Pubmed)

("dementia"[MeSH Terms] OR "dementia"[All Fields] OR dement\*[tiab] OR "Alzheimer"[All Fields] OR "cognitive impairment" [tiab])  
MEDLINE[Title/Abstract] OR (systematic AND review[Title/Abstract] OR meta-analysis[Publication Type])

## 2. EMBASE

#1 'dementia'/exp OR 'dementia'  
#2 'alzheimers disease'  
#3 cognitive AND impairment  
#4 'systematic review'  
#5 'meta analysis'  
#6 #1 OR #2 OR #3  
#7 #4 OR #5  
#8 #6 AND #7  
#9 #6 AND #7

## 3. CINAHL

S1 (MH Dementia OR Alzheimer OR dementia)  
S2 (systematic review OR meta-analysis OR AB medline)  
S3 S1 AND S2

## 4. Cochrane Library

#1 MeSH descriptor: [Dementia] explode all trees  
#2 dementia  
#3 alzheimer  
#4 cognitive impairment  
#5 MeSH descriptor: [Mild Cognitive Impairment] explode all trees  
#6 #1 or #2 or #3 or #4 or #5

## 5. PsychInfo (via Ovid)

#1. (exp dementia/) OR (dementia.mp.) OR ( alzheimer\*.mp.) OR (exp alzheimer's disease/)  
#2. (systematic review.mp.) OR (exp Meta Analysis/) OR (MEDLINE.ab.)  
#3. #1 AND 2
