# Supplementary material for: Systematic review of systematic reviews of non-pharmacological interventions to treat behavioural disturbances in older patients with dementia. The SENATOR-OnTop series
Source: PubMed Central journal article supplement — BMJ Open. 2017 Mar 16;7(3):e012759. doi: 10.1136/bmjopen-2016-012759 (PMC5372076; doi:10.1136/bmjopen-2016-012759), 2017-03-16
Supplement: bmjopen-2016-012759supp_appendix3.pdf [file bmjopen-2016-012759supp_appendix3.pdf]

### Appendix 3. Methodological Quality Assessment of the included systematic reviews

| <b>Author</b>           | <b>1</b> | <b>2</b> | <b>3</b> | <b>4</b> | <b>5</b> | <b>6</b> | <b>7</b> | <b>8</b> | <b>9</b> | <b>10</b> | <b>11</b> | <b>Rating</b> |
|-------------------------|----------|----------|----------|----------|----------|----------|----------|----------|----------|-----------|-----------|---------------|
| <i>Kverno 2009</i>      | No       | No       | Yes      | No       | No       | Yes      | Yes      | Yes      | No       | No        | No        | 4             |
| <i>Lai 2009</i>         | Yes      | Yes      | Yes      | No       | No       | Yes      | Yes      | Yes      | Yes      | Yes       | No        | 8             |
| <i>Yu 2009</i>          | No       | CA       | Yes      | No       | No       | Yes      | Yes      | No       | NA       | No        | No        | 3             |
| <i>Collet 2010</i>      | No       | Yes      | No       | No       | No       | Yes      | Yes      | Yes      | Yes      | No        | No        | 5             |
| <i>O'Neill 2011</i>     | No       | Yes      | Yes      | No       | No       | Yes      | Yes      | Yes      | Yes      | No        | Yes       | 7             |
| <i>Olazaran 2010</i>    | No       | Yes      | Yes      | Yes      | No       | Yes      | Yes      | Yes      | Yes      | Yes       | Yes       | 9             |
| <i>Vasse 2010</i>       | No       | No       | Yes      | No       | No       | Yes      | Yes      | Yes      | Yes      | No        | No        | 5             |
| <i>Wall 2010</i>        | No       | CA       | Yes      | No       | No       | Yes      | No       | NA       | NA       | No        | No        | 2             |
| <i>Padilla 2011</i>     | No       | CA       | Yes      | Yes      | No       | No       | No       | No       | No       | NA        | No        | 2             |
| <i>Potter 2011</i>      | No       | Yes      | Yes      | No       | No       | Yes      | Yes      | Yes      | Yes      | No        | No        | 6             |
| <i>Robinson 2011</i>    | No       | Yes      | Yes      | Yes      | No       | No       | No       | NA       | No       | No        | No        | 3             |
| <i>Salami 2011</i>      | No       | CA       | Yes      | No       | No       | Yes      | Yes      | No       | NA       | No        | No        | 3             |
| <i>Fung 2012</i>        | No       | Yes      | Yes      | No       | No       | Yes      | Yes      | Yes      | Yes      | No        | No        | 6             |
| <i>Kiepe 2012</i>       | No       | No       | No       | No       | No       | Yes      | No       | No       | No       | No        | No        | 1             |
| <i>Kim 2012</i>         | No       | Yes      | Yes      | No       | No       | Yes      | Yes      | Yes      | Yes      | Yes       | No        | 7             |
| <i>Moniz Cook 2012</i>  | Yes       | Yes       | 11            |
| <i>Seitz 2012</i>       | No       | Yes      | Yes      | No       | No       | Yes      | Yes      | Yes      | Yes      | No        | No        | 6             |
| <i>Subramaniam 2012</i> | No       | CA       | Yes      | No       | No       | Yes      | Yes      | No       | NA       | No        | No        | 3             |
| <i>Thune-Boyle 2012</i> | No       | CA       | Yes      | No       | No       | Yes      | No       | NA       | NA       | No        | No        | 2             |
| <i>Woods 2012</i>       | Yes       | No        | 10            |
| <i>Aguirre 2013</i>     | No       | Yes      | Yes      | No       | No       | Yes      | Yes      | Yes      | Yes      | No        | No        | 5             |
| <i>Alves 2013</i>       | No       | Yes      | Yes      | No       | No       | Yes      | No       | No       | Yes      | No        | No        | 4             |
| <i>Bernabei 2013</i>    | No       | Yes      | Yes      | No       | No       | Yes      | No       | No       | No       | No        | Yes       | 4             |
| <i>Blake 2013</i>       | No       | No       | No       | No       | No       | Yes      | No       | No       | No       | No        | No        | 1             |
| <i>Carrion 2013</i>     | No       | Yes      | Yes      | No       | No       | Yes      | Yes      | No       | No       | No        | No        | 4             |
| <i>Eggenberger 2013</i> | No       | Yes      | Yes      | No       | No       | Yes      | No       | No       | No       | No        | No        | 3             |

|                           |     |     |     |     |     |     |     |     |     |     |     |    |
|---------------------------|-----|-----|-----|-----|-----|-----|-----|-----|-----|-----|-----|----|
| <i>Guzman-Garcia 2013</i> | No  | No  | Yes | No  | No  | Yes | Yes | No  | No  | No  | No  | 3  |
| <i>McDermott 2013</i>     | No  | Yes | Yes | No  | No  | Yes | Yes | Yes | No  | No  | No  | 5  |
| <i>Moyle 2013</i>         | No  | No  | Yes | No  | No  | Yes | Yes | Yes | No  | No  | No  | 4  |
| <i>Ueda 2013</i>          | No  | Yes | Yes | No  | No  | Yes | Yes | Yes | Yes | Yes | No  | 7  |
| <i>Vasionytė 2013</i>     | No  | No  | Yes | No  | Yes | Yes | No  | NA  | Yes | No  | No  | 4  |
| <i>Zimmerman 2013</i>     | No  | Yes | Yes | No  | No  | Yes | Yes | Yes | Yes | No  | Yes | 7  |
| <i>Chaudhury 2013</i>     | No  | Yes | Yes | No  | No  | Yes | No  | No  | No  | No  | Yes | 4  |
| <i>Forbes 2014</i>        | Yes | No  | 11 |
| <i>Forrester 2014</i>     | Yes | CA  | Yes | No  | 9  |
| <i>Gonzalez 2014</i>      | No  | Yes | Yes | No  | No  | Yes | No  | No  | No  | No  | No  | 3  |
| <i>Livingston 2014</i>    | Yes | Yes | Yes | Yes | No  | Yes | Yes | Yes | Yes | Yes | Yes | 10 |
| <i>Whear 2014</i>         | No  | Yes | Yes | Yes | No  | Yes | Yes | Yes | Yes | Yes | Yes | 9  |

All 11-items were scored as “Yes”, “No”, “Can’t Answer” or “Not Applicable”. AMSTAR comprises the following items:

1. ‘a priori’ design provided;
2. duplicate study selection/data extraction;
3. comprehensive literature search;
4. status of publication as inclusion criteria (i.e., grey or unpublished literature);
5. list of studies included/excluded provided;
6. characteristics of included studies documented;
7. scientific quality assessed and documented;
8. appropriate formulation of conclusions (based on methodological rigor and scientific quality of the studies);
9. appropriate methods of combining studies (homogeneity test, effect model used and sensitivity analysis);
10. assessment of publication bias (graphic and/or statistical test); and
11. conflict of interest statement.
